# Supplementary material for: Meaningful digital biomarkers derived from wearable sensors to predict daily fatigue in multiple sclerosis patients and healthy controls
Source: PubMed Central journal article supplement (PMC10867654; doi:10.1016/j.isci.2024.108965), 2024-01-18
Supplement: mmc1.pdf [file mmc1.pdf]

iScience, Volume 27

## **Supplemental information**

### **Meaningful digital biomarkers derived from wearable sensors to predict daily fatigue in multiple sclerosis patients and healthy controls**

**Max Moebus, Shkurta Gashi, Marc Hilty, Pietro Oldrati, PHRT author consortium, and Christian Holz**

| medication      | MS I | MS II |
|-----------------|------|-------|
| None            | 4    | 4     |
| Dimethylfumarat | 3    | 2     |
| Natalizumab     | 7    | 4     |
| Ocrelizumab     | 7    | 4     |
| Ozanimod        | 1    | 1     |
| Rituximab       | 0    | 3     |
| Siponimod       | 1    | 0     |
| Teriflunomid    | 0    | 1     |
| aHSCT           | 4    | 5     |

Table S1: Numbers of participants who were on disease-modifying therapy (DMT) during the study per MS patient group, related to Table 1.

| medication | MS I | MS II |
|------------|------|-------|
| None       | 21   | 13    |
| Betmiga    | 0    | 3     |
| Citalopram | 1    | 0     |
| Cymbalta   | 0    | 3     |
| Duloxetine | 0    | 1     |
| MetoZerok  | 0    | 1     |
| Minoxidil  | 2    | 0     |
| Ozanimod   | 1    | 1     |
| Ritalin    | 0    | 1     |
| Siponimod  | 1    | 0     |
| Tamsulosin | 0    | 1     |
| Trittico   | 1    | 0     |

Table S2: Numbers of participants who took medication known to affect HRV metrics during the study, related to Table 1.

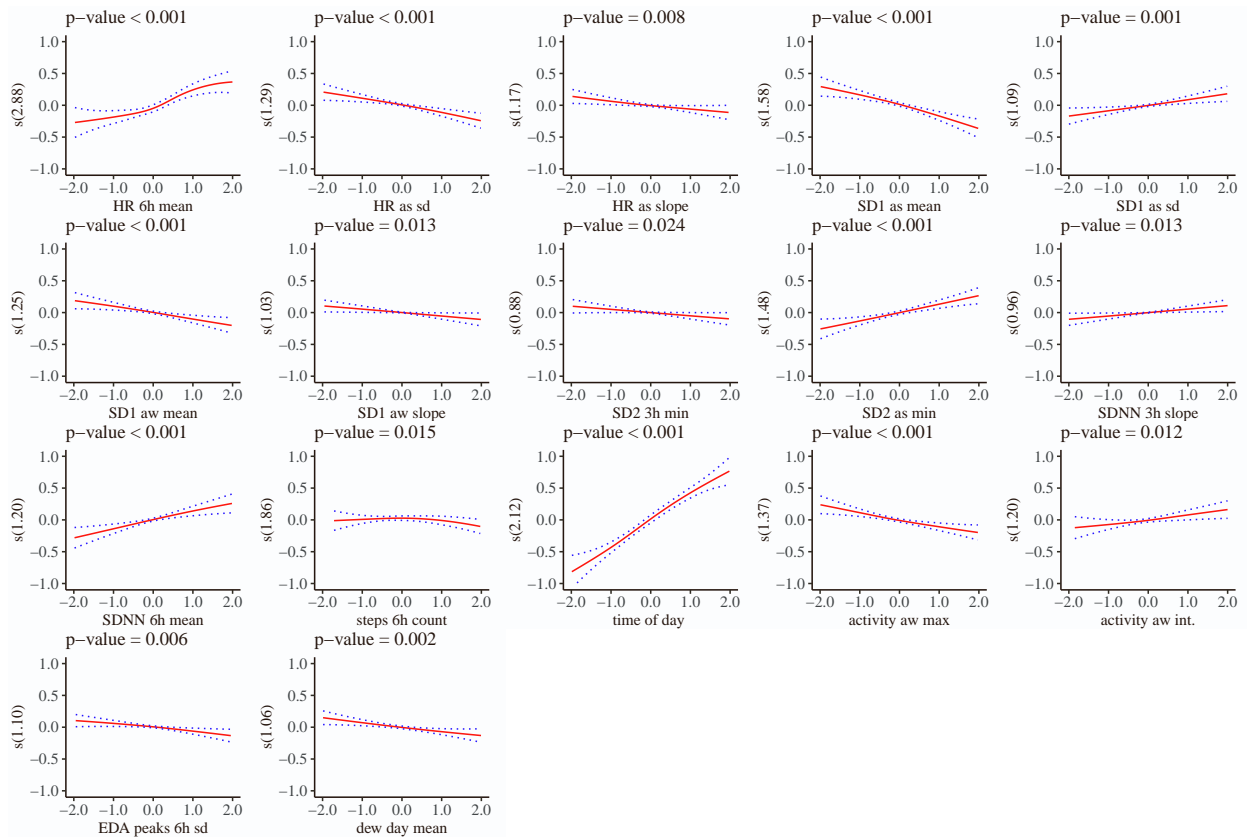

Figure S1: Calculated effects on VAS fatigue ratings for the control group, related to Table 4.

As an example, this Figure displays the calculated effects that are summarized in Table 4 in column 'Co'. Variables were recorded during 1 hour prior to a VAS fatigue rating (1h), 3 hours prior (3h), 6 hours prior (6h), since participants were awake (aw) and while they were asleep before a VAS fatigue rating (as).

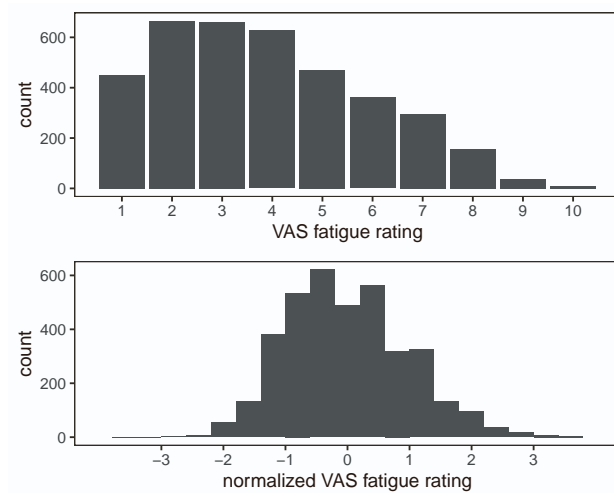

Figure S2: Histogram of VAS fatigue rating as reported (top) and normalized per participant (bottom), related to Figure 1 and Section 5 (Method details).

The continuous normalized VAS fatigue ratings are binned.

| HRV metric |        |      | MS I         | MS II        | <i>p</i>     |
|------------|--------|------|--------------|--------------|--------------|
| HR         | asleep | min  | 47.1 (4.2)   | 48.1 (5.1)   | 0.383        |
| HR         | awake  | min  | 52.4 (4.3)   | 53.8 (6.3)   | 0.345        |
| HR         | asleep | mean | 62 (5.4)     | 63.2 (7.1)   | 0.633        |
| HR         | awake  | mean | 75.2 (5.6)   | 76.8 (8.3)   | 0.363        |
| HR         | asleep | max  | 99.1 (6.6)   | 99.4 (9)     | 0.933        |
| HR         | awake  | max  | 118.1 (9.2)  | 116.8 (12.3) | 0.437        |
| SDNN       | asleep | min  | 29.3 (14.4)  | 25.1 (10.4)  | 0.334        |
| SDNN       | awake  | min  | 36.7 (11.9)  | 30.9 (10)    | <b>0.053</b> |
| SDNN       | asleep | mean | 68.9 (24.1)  | 60.4 (20.1)  | 0.211        |
| SDNN       | awake  | mean | 64.4 (19.5)  | 56.7 (17.8)  | <b>0.099</b> |
| SDNN       | asleep | max  | 146.8 (42)   | 130.8 (33.4) | 0.211        |
| SDNN       | awake  | max  | 113.1 (31.5) | 105.4 (32.7) | 0.344        |
| SD1        | asleep | min  | 24.2 (14.1)  | 18.2 (10.5)  | <b>0.078</b> |
| SD1        | awake  | min  | 26.6 (10.4)  | 20.2 (7.7)   | <b>0.005</b> |
| SD1        | asleep | mean | 45.8 (25.1)  | 37.6 (19.5)  | 0.264        |
| SD1        | awake  | mean | 43.9 (16)    | 35 (14.3)    | <b>0.022</b> |
| SD1        | asleep | max  | 75.6 (38.2)  | 66.2 (30.8)  | 0.363        |
| SD1        | awake  | max  | 66.8 (23.6)  | 55.7 (21.2)  | <b>0.060</b> |
| SD2        | asleep | min  | 33.9 (15.7)  | 30.5 (11.4)  | 0.715        |
| SD2        | awake  | min  | 45.9 (14.9)  | 39.1 (12.2)  | <b>0.081</b> |
| SD2        | asleep | mean | 88.7 (28.1)  | 78.7 (24.4)  | 0.198        |
| SD2        | awake  | mean | 84.4 (25.4)  | 75.1 (23.2)  | 0.145        |
| SD2        | asleep | max  | 201.3 (56.5) | 179.4 (45.2) | 0.211        |
| SD2        | awake  | max  | 154 (43.3)   | 144.6 (45)   | 0.344        |

Table S3: Mean (and SD) of HRV metrics for MS patients averaged while participants were awake and asleep, related to Table 1.

This table relates to the split of MS patients into two subgroups in Table 1: MS patients with a functional ANS (MS I) and MS patients with a dysfunctional ANS (MS II). P-values corresponding to Wilcoxon signed rank tests are marked bold if they are smaller than 0.1.
