# Supplementary material for: Meaningful digital biomarkers derived from wearable sensors to predict daily fatigue in multiple sclerosis patients and healthy controls
Source: PubMed Central journal article supplement (PMC10867654; doi:10.1016/j.isci.2024.108965), 2024-01-18
Supplement: mmc2.pdf [file mmc2.pdf]

MMAI-MS author consortium

Christian Holz (1), Gunnar Ratsch (1), Fernando Perez-Cruz (2), Cristóbal Esteban (1), Martina Baumann (1), Rita Kuznetsova (1), Neda Davoudi (1), Shkurta Gashi (1), Liliana Barrios (1), Max Moebus (1), Ekaterina Krymova (2), Luis Salamanca (2), Firat Ozdemir (2), Marc Hilty (3), Veronika Kana (3), Patrick Roth (3), Andreas Lutterotti (3), (1): ETH Zurich, Department of Computer Science, Universitätsstrasse 6, 8092 Zürich, Switzerland, (2): Swiss Data Science Centre, Turnerstrasse 1, 8092 Zürich, Switzerland, (3): University Hospital Zurich, Neuroimmunology Department, Frauenklinikstrasse 26, 8091, Switzerland
